# Supplementary material for: Substituent effect on controlled release of fragrant aldehydes from pH-triggered nicotinoylhydrazone-based precursors
Source: Royal Society of Chemistry journal article supplement (doi:10.1039/d2me00279e), 2023-01-01
Supplement: d2me00279e1.pdf [file d2me00279e1.pdf]

## Supporting Information

### Substituent Effect on Controlled Release of Fragrant Aldehydes from pH-triggered Nicotinoylhydrazone-based Precursors

Zoubing Xiao<sup>a, b</sup>, Chengjing Wu<sup>a</sup>, Xinyu Lu<sup>a\*</sup>, Yunwei Niu<sup>a</sup>, Peiran Yu<sup>a</sup>, and Xiaojie Ma<sup>a</sup>

a. School of Perfume and Aroma Technology, Shanghai Institute of Technology, Shanghai 201418, China

b. School of Agriculture and Biology, Shanghai Jiao Tong University, Shanghai 200240, China

#### Contents

|                                                                                                                  |       |
|------------------------------------------------------------------------------------------------------------------|-------|
| 1. Weight loss and odor of the four fragrance precursors .....                                                   | S2    |
| 2. Infrared information of four fragrance precursors.....                                                        | S2    |
| 3. <sup>1</sup> H, <sup>13</sup> C NMR and Mass spectra of four fragrance precursors.....                        | S2–S6 |
| 4. Changes of uv absorption curves of four fragrance precursors in pH 2 and pH 6 standard buffer solutions ..... | S7    |
| 5. Aroma compounds release concentration of four fragrance precursors in pH2, pH6 standard buffer solutions..... | S7    |
| 6. Release kinetic models of four fragrance precursors in pH2, pH6 standard buffers solutions.....               | S8    |
| 7. Results of the Kirby Bauer test for the agar medium placed over the layer of NTA2 and control.....            | S8    |

## 1. Weight loss and odor of the four fragrance precursors

**Table S1.** Weight loss and odor of the four fragrance precursors.

| fragrance precursors | weight /mg (under atmosphere, 25°C, RH 30%) |                |                 | odor (pure water as reference)              |          |
|----------------------|---------------------------------------------|----------------|-----------------|---------------------------------------------|----------|
|                      | initial                                     | after one year | weight loss (%) | in water ( $c = 35.0 \mu\text{molL}^{-1}$ ) | solid    |
| NTA1                 | 1538.3                                      | 1537.7         | 0.039           | odorless                                    | odorless |
| NTA2                 | 1497.2                                      | 1496.8         | 0.027           | odorless                                    | odorless |
| NTA3                 | 1500.6                                      | 1499.9         | 0.047           | odorless                                    | odorless |
| NTA4                 | 1489.4                                      | 1489.1         | 0.020           | odorless                                    | odorless |

## 2. Infrared information of four fragrance precursors

**Table S2.** Effect of electronic properties and positions of substitution groups on the IR spectra of fragrance precursors (potassium bromide,  $\text{cm}^{-1}$ ).

| fragrance precursors | FT-IR ( $\text{cm}^{-1}$ ) |      |      |          |         |        |
|----------------------|----------------------------|------|------|----------|---------|--------|
|                      | VNH                        | VC=O | VC=N | VPh-O-Me | VPh-iPr | VPh-OH |
| NTA1                 | 3486                       | 1695 | 1596 |          |         |        |
| NTA2                 | 3463                       | 1688 | 1570 | 1168     |         |        |
| NTA3                 | 3278                       | 1681 | 1565 |          | 2972    |        |
| NTA4                 | 3287                       | 1686 | 1552 |          |         | 1295   |

## 3. $^1\text{H}$ , $^{13}\text{C}$ NMR and Mass spectra of four fragrance precursors

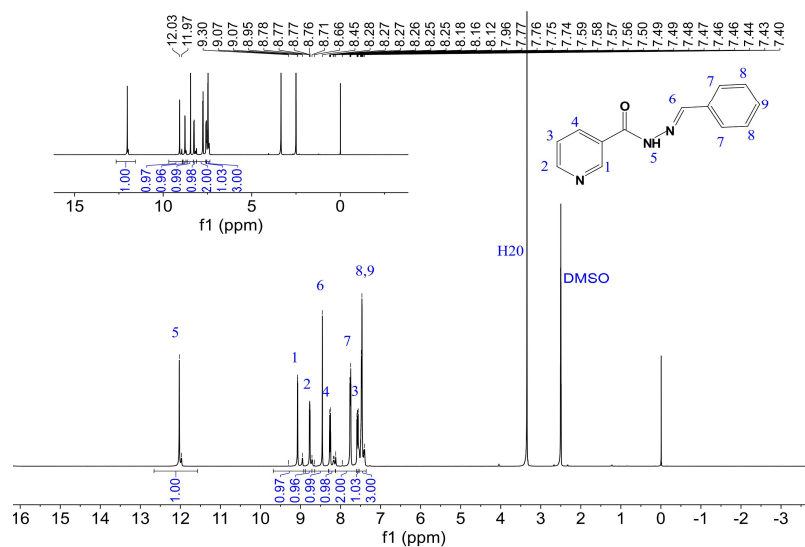

**Figure S1.**  $^1\text{H}$  NMR spectrum of compound NTA1 in DMSO.

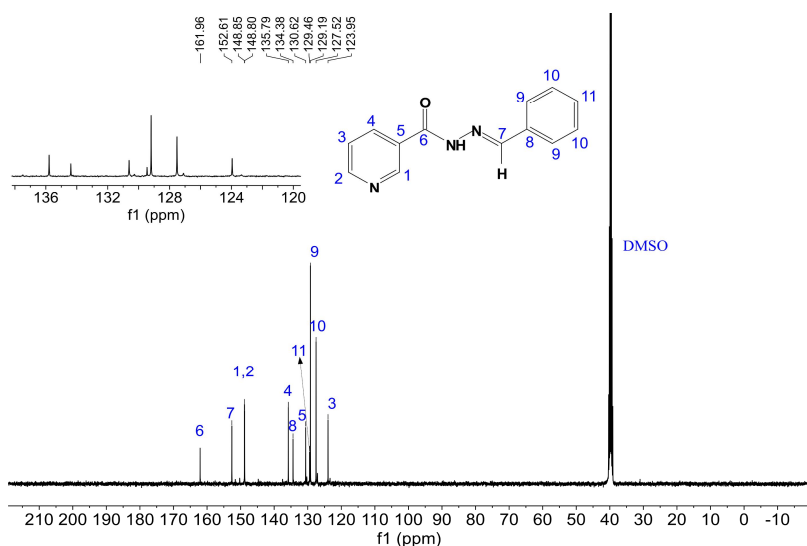

Figure S2.  $^{13}\text{C}$  NMR spectrum of compound NTA1 in DMSO.

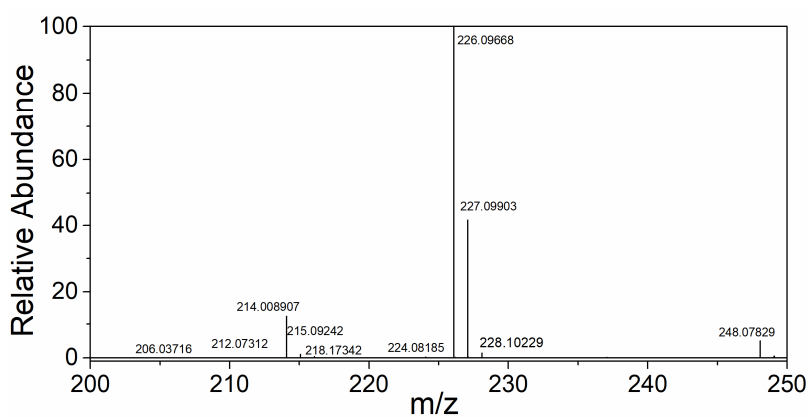

Figure S3. HRMS spectrum of compound NTA1.

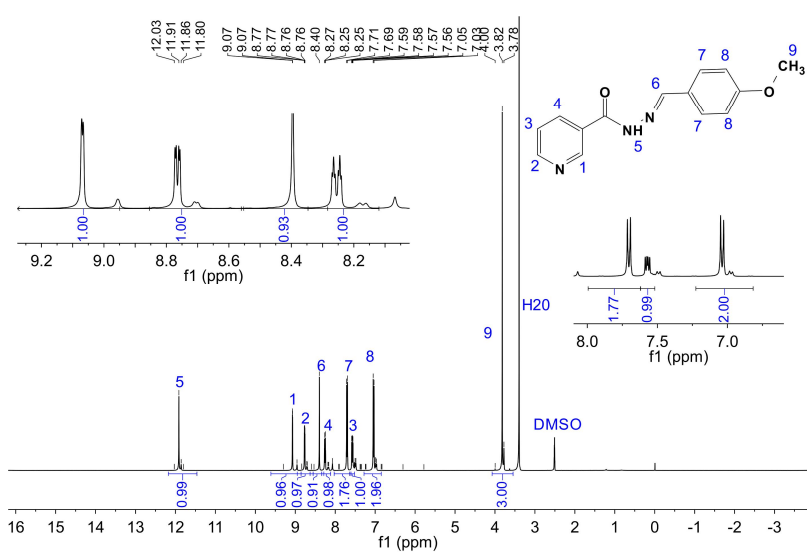

Figure S4.  $^1\text{H}$  NMR spectrum of compound NTA2 in DMSO.

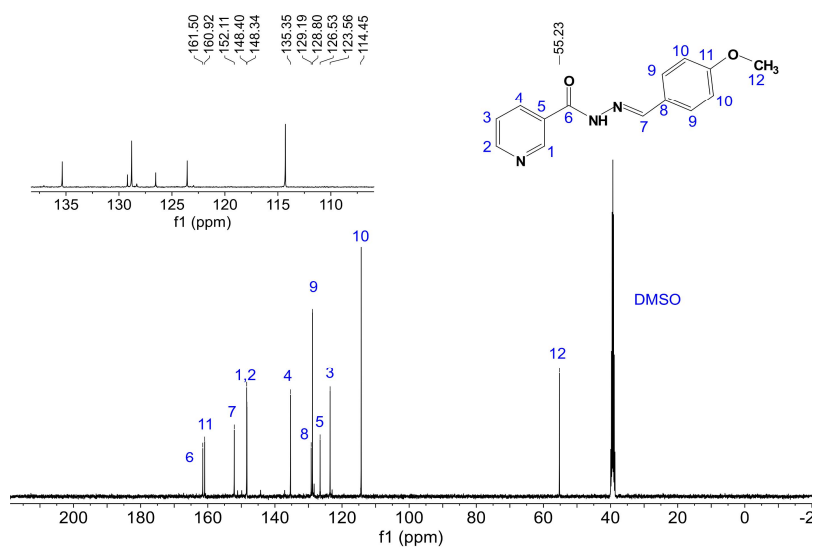

Figure S5.  $^{13}\text{C}$  NMR spectrum of compound NTA2 in DMSO.

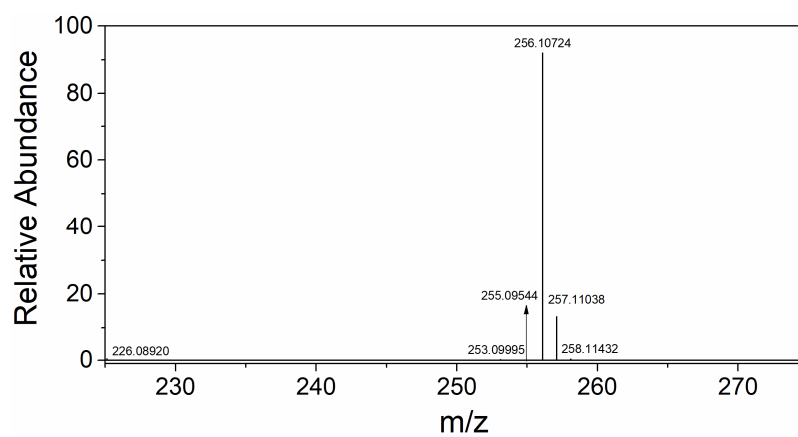

Figure S6. HRMS spectrum of compound NTA2.

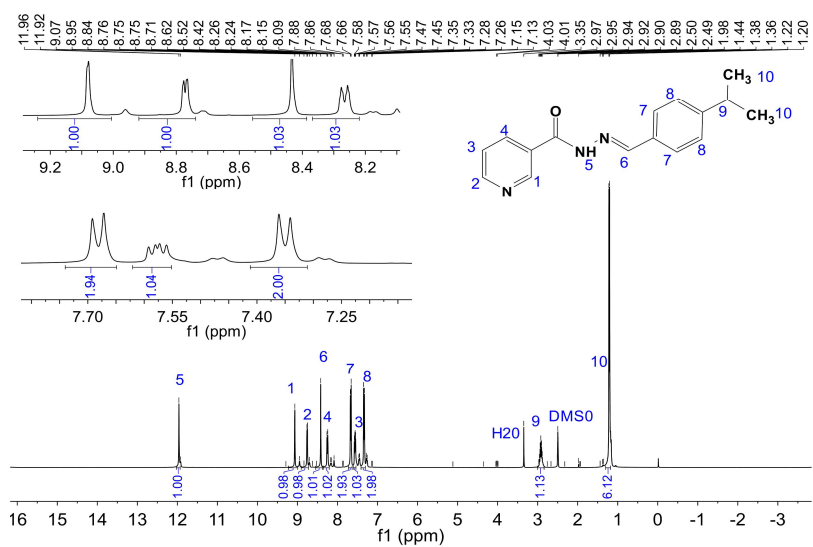

Figure S7.  $^1\text{H}$  NMR spectrum of compound NTA3 in DMSO.

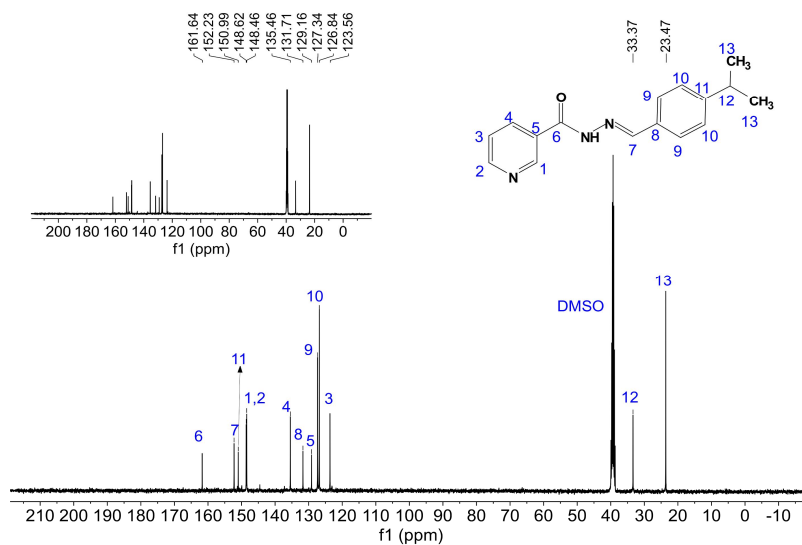

Figure S8. <sup>13</sup>C NMR spectrum of compound NTA3 in DMSO.

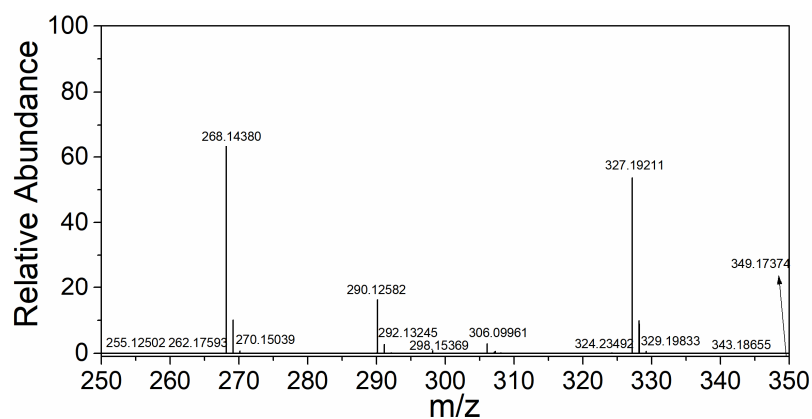

Figure S9. HRMS spectrum of compound NTA3.

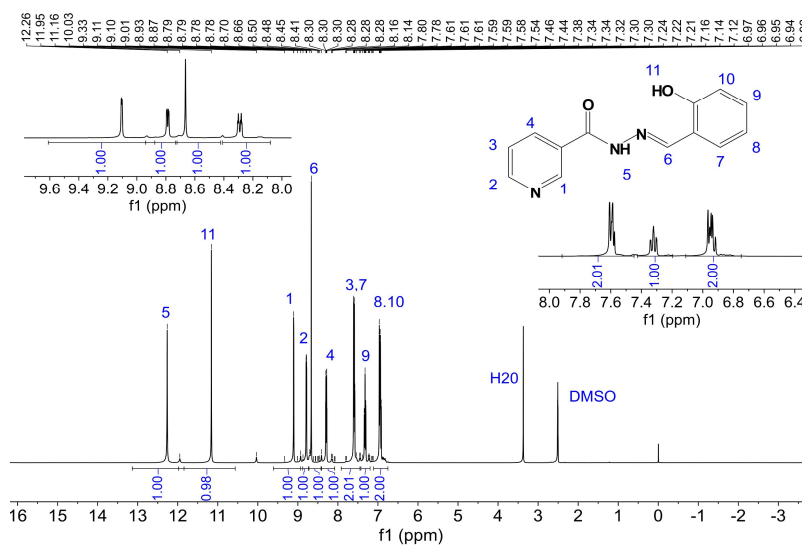

Figure S10. <sup>1</sup>H NMR spectrum of compound NTA4 in DMSO.

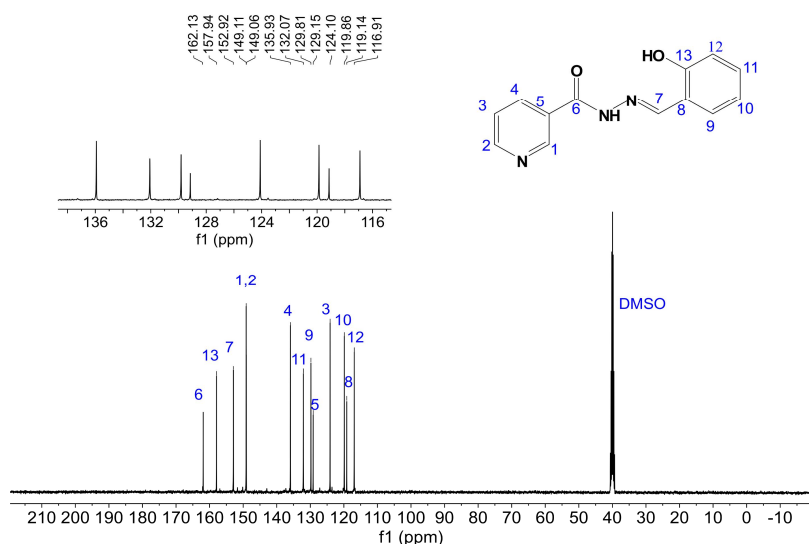

**Figure S11.** <sup>13</sup>C NMR spectrum of compound NTA4 in DMSO.

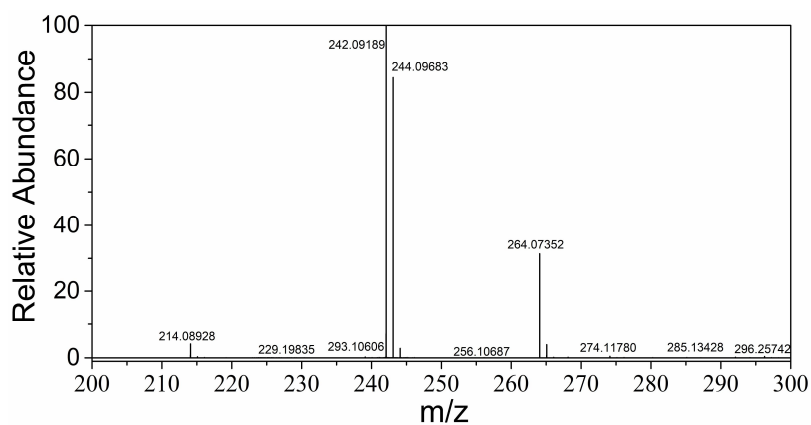

**Figure S12.** HRMS spectrum of compound NTA4.

**Table S3.** HRMS spectrum of compound data of compound NTA1-NTA4.

| Fragrance precursor | Calculated | Found    |
|---------------------|------------|----------|
| NTA1                | 226.0975   | 226.0967 |
| NTA2                | 256.1080   | 256.1072 |
| NTA3                | 268.1444   | 268.144  |
| NTA4                | 242.0240   | 242.0919 |

#### 4. Changes of uv absorption curves of four fragrance precursors in pH 2 and pH 6 standard buffer solutions

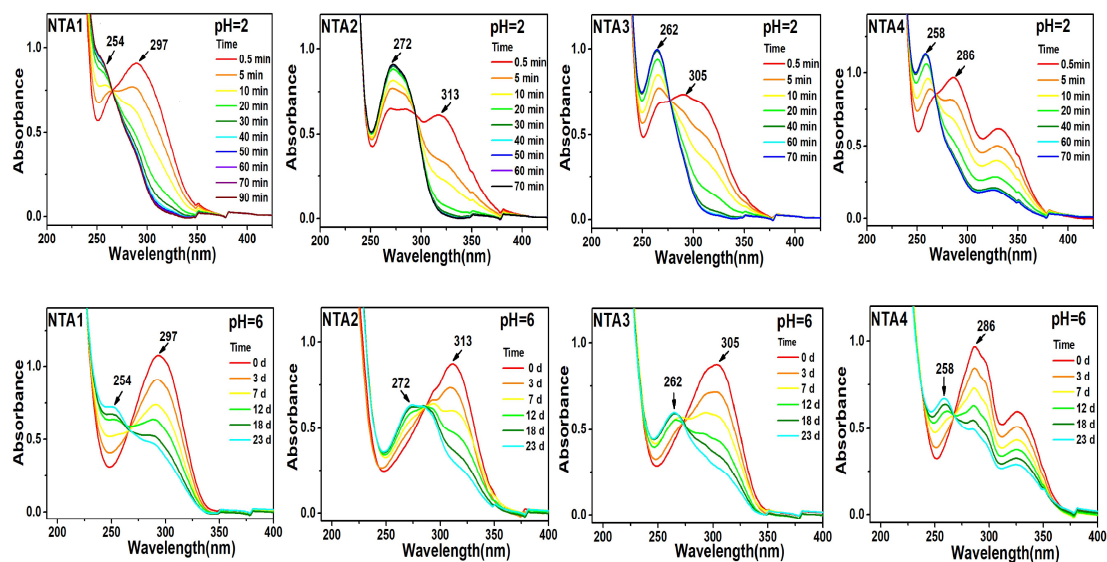

Figure S13. Time-dependent UV-Vis absorbance of NTA1-NTA4 in buffer solution (pH 2.0, 6.0).

#### 5. Aroma compounds release concentration of four fragrance precursors in pH2, pH6 standard buffer solution

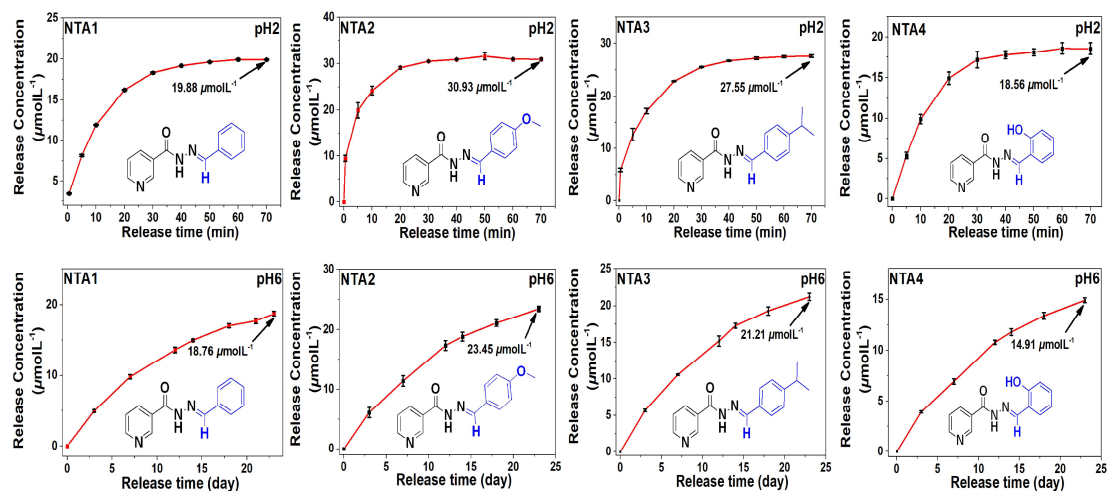

Figure S14. Time-dependent release concentration of NTA1-NTA4 in buffer solution (pH 2.0, 6.0).

## 6. Release kinetic models of four fragrance precursors in pH 2, pH 6 standard buffers solutions

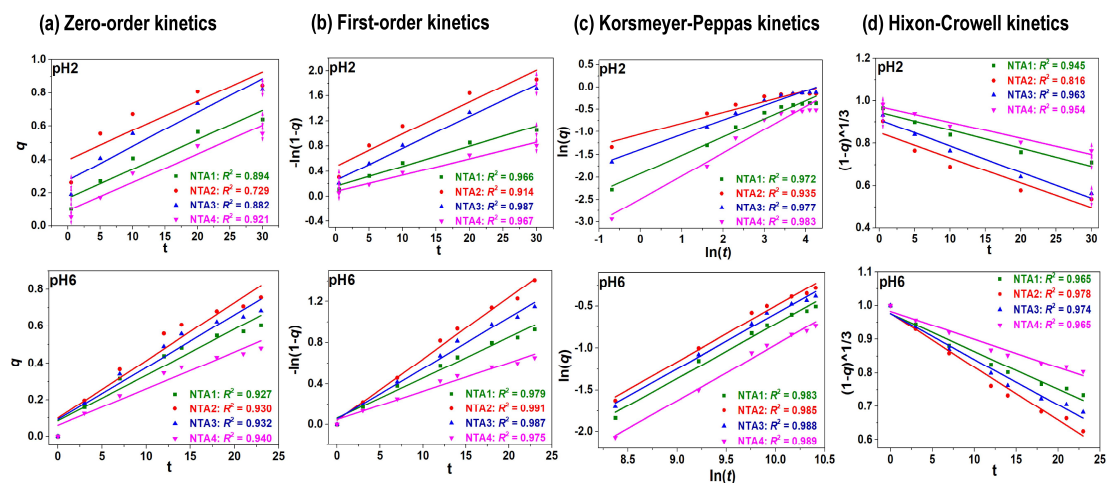

Figure S15. Kinetic models and the corresponding best-fit constants of fragrance precursors NTA1–NTA4 in buffer solution (pH 2.0, 6.0)

## 7. Results of the Kirby Bauer test for the agar medium placed over the layer of NTA2 and control.

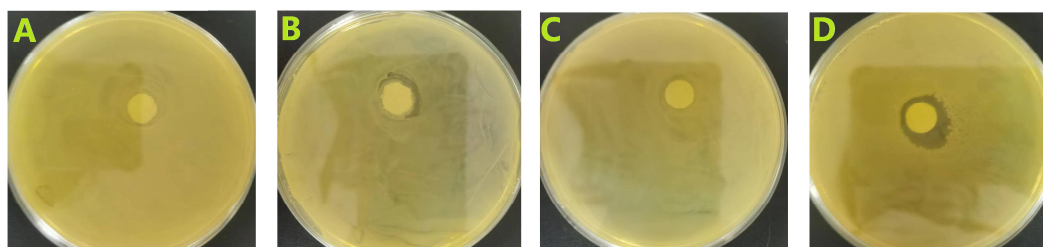

Figure S16. Results of the Kirby Bauer test of *Staphylococcus aureus* (A: control, B: NTA2), and *Escherichia coli* (C: control, D: NTA2).
